# Supplementary material
Source: PubMed Central journal article supplement (PMC4086728)
Supplement: NIHMS592234-supplement-Supplemental_Digital_Content.pdf [file NIHMS592234-supplement-Supplemental_Digital_Content.pdf]

**Appendix. Prepregnancy Calorie-Adjusted Folate Intake and Relative Risk of Spontaneous Abortion Among Subgroups of Women**

| Subgroup                                       | Category of Intake, mcg/day |                   |                   |                   |                   | P*      |
|------------------------------------------------|-----------------------------|-------------------|-------------------|-------------------|-------------------|---------|
|                                                | Q1                          | Q2                | Q3                | Q4                | Q5                |         |
| <b>All participants</b>                        |                             |                   |                   |                   |                   |         |
| Cases/Total                                    | 537/3185                    | 572/3192          | 559/3197          | 562/3186          | 526/3190          |         |
| <b>Total Folate</b> , RR (95% CI)              | 1.00 (Ref)                  | 1.02 (0.92, 1.14) | 0.99 (0.89, 1.10) | 0.98 (0.88, 1.09) | 0.91 (0.82, 1.02) | 0.04    |
| Cases/Total                                    | 1145/6638                   | 701/3779          | 589/3351          | 321/2182          |                   |         |
| <b>Supplemental Folate</b> , RR (95% CI)       | 1.00 (Ref)                  | 0.95 (0.87, 1.03) | 0.95 (0.87, 1.04) | 0.80 (0.71, 0.90) |                   | 0.0002  |
| <b>Women &lt; 40 yrs</b>                       |                             |                   |                   |                   |                   |         |
| Cases/Total                                    | 436/2835                    | 439/2732          | 406/2697          | 409/2663          | 381/2692          |         |
| <b>Total Folate</b> , RR (95% CI)              | 1.00 (Ref)                  | 1.04 (0.92, 1.17) | 0.97 (0.86, 1.10) | 0.99 (0.88, 1.13) | 0.90 (0.79, 1.03) | 0.06    |
| Cases/Total                                    | 935/5911                    | 467/3008          | 425/2828          | 244/1872          |                   |         |
| <b>Supplemental Folate</b> , RR (95% CI)       | 1.00 (Ref)                  | 0.94 (0.84, 1.04) | 0.94 (0.84, 1.04) | 0.82 (0.72, 0.93) |                   | 0.003   |
| <b>No History of Infertility</b>               |                             |                   |                   |                   |                   |         |
| Cases/Total                                    | 453/2748                    | 494/2799          | 474/2728          | 469/2724          | 429/2725          |         |
| <b>Total Folate</b> , RR (95% CI)              | 1.00 (Ref)                  | 1.03 (0.92, 1.16) | 1.00 (0.89, 1.12) | 0.98 (0.87, 1.10) | 0.90 (0.80, 1.02) | 0.03    |
| Cases/Total                                    | 976/5780                    | 594/3223          | 478/2848          | 271/1873          |                   |         |
| <b>Supplemental Folate</b> , RR (95% CI)       | 1.00 (Ref)                  | 0.96 (0.88, 1.06) | 0.93 (0.84, 1.03) | 0.82 (0.72, 0.92) |                   | 0.001   |
| <b>Married &amp; no oral contraception use</b> |                             |                   |                   |                   |                   |         |
| Cases/Total                                    | 306/1963                    | 328/2036          | 330/2097          | 338/2152          | 360/2339          |         |
| <b>Total Folate</b> , RR (95% CI)              | 1.00 (Ref)                  | 1.01 (0.87, 1.16) | 0.96 (0.83, 1.11) | 0.94 (0.81, 1.08) | 0.92 (0.80, 1.06) | 0.15    |
| Cases/Total                                    | 648/4179                    | 418/2448          | 367/2301          | 229/1659          |                   |         |
| <b>Supplemental Folate</b> , RR (95% CI)       | 1.00 (Ref)                  | 0.97 (0.86, 1.10) | 0.95 (0.84, 1.08) | 0.85 (0.73, 0.98) |                   | 0.01    |
| <b>First Eligible Pregnancy</b>                |                             |                   |                   |                   |                   |         |
| Cases/Total                                    | 382/2346                    | 411/2362          | 368/2228          | 348/2143          | 286/1993          |         |
| <b>Total Folate</b> , RR (95% CI)              | 1.00 (Ref)                  | 1.03 (0.90, 1.16) | 0.98 (0.86, 1.11) | 0.94 (0.82, 1.07) | 0.86 (0.74, 0.99) | 0.007   |
| Cases/Total                                    | 839/5010                    | 435/2472          | 361/2290          | 160/1300          |                   |         |
| <b>Supplemental Folate</b> , RR (95% CI)       | 1.00 (Ref)                  | 0.94 (0.85, 1.05) | 0.90 (0.81, 1.01) | 0.73 (0.62, 0.85) |                   | <0.0001 |
| <b>Only Years 1992, 1996, 2000, &amp; 2004</b> |                             |                   |                   |                   |                   |         |
| Cases/Total                                    | 160/1022                    | 181/1040          | 180/1082          | 177/1112          | 161/1128          |         |
| <b>Total Folate</b> , RR (95% CI)              | 1.00 (Ref)                  | 1.06 (0.88, 1.29) | 0.99 (0.81, 1.20) | 0.93 (0.76, 1.13) | 0.83 (0.68, 1.02) | 0.01    |

Gaskins AJ, Rich-Edwards JW, Hauser R, Williams PL, Gillman MW, Ginsburg ES, et al. Maternal prepregnancy folate intake and risk of spontaneous abortion and stillbirth. *Obstet Gynecol* 2014;124.

The authors provided this information as a supplement to their article.

| Cases/Total                             | 356/2144   | 232/1290          | 185/1182          | 86/768            |         |
|-----------------------------------------|------------|-------------------|-------------------|-------------------|---------|
| <b>Supplemental Folate, RR (95% CI)</b> | 1.00 (Ref) | 0.89 (0.76, 1.04) | 0.84 (0.71, 0.99) | 0.61 (0.48, 0.76) | <0.0001 |

Analyses run using a log-binomial generalized linear model with an exchangeable working correlation structure to compute relative risk estimates. Tests for linear trend were conducted by using the median values in each category as a continuous variable.

\*Adjusted for age (continuous) and energy intake (continuous), body mass index (<18.5, 18.5-24.9, 25-29.9, ≥30, and missing), smoking status (never, former, current, and missing), physical activity (< 3 MET-h/wk, 3-8.9 MET-h/wk, 9-17.9 MET-h/wk, 18-26.9 MET-h/wk, 27-41.9 MET-h/wk, >42 MET-h/wk, and missing), year of pregnancy (continuous), history of infertility (no, yes, and missing), marital status (married, not married), and race (white, other).

Gaskins AJ, Rich-Edwards JW, Hauser R, Williams PL, Gillman MW, Ginsburg ES, et al. Maternal prepregnancy folate intake and risk of spontaneous abortion and stillbirth. *Obstet Gynecol* 2014;124.

The authors provided this information as a supplement to their article.

© Copyright 2014 American College of Obstetricians and Gynecologists.

Page 2 of 2
